# Supplementary material for: CyanoHABs and CAPs: assessing community-based monitoring of PM 2.5 with regional sources of pollution in rural, northeastern North Carolina
Source: Royal Society of Chemistry journal article supplement (doi:10.1039/d5ea00020c), 2025-01-01
Supplement: d5ea00020c1.pdf [file d5ea00020c1.pdf]

SUPPLEMENTAL INFORMATION

**CyanoHABs and CAPs: assessing community-based monitoring of fine particulate matter with regional sources of pollution in rural, northeastern North Carolina**

Haley E. Plaas<sup>1,\*</sup>, Colleen Karl<sup>2</sup>, Rachael Cogbill<sup>3</sup>, Nicole Rosales-Garcia<sup>1</sup>, Ashley H. Stoop<sup>4</sup>, Lisa L. Satterwhite<sup>5</sup>, Martine E. Mathieu-Campbell<sup>6</sup>, Jennifer Richmond-Bryant<sup>6,7</sup>, Hans W. Paerl<sup>3,8,9</sup>, and Douglas S. Hamilton<sup>1</sup>

<sup>1</sup>Department of Marine, Earth, and Atmospheric Sciences, North Carolina State University, Raleigh, NC 27695, USA

<sup>2</sup>Chowan Edenton Environmental Group, Tyner, NC 27980, USA

<sup>3</sup>Department of Environmental Sciences and Engineering, UNC-Chapel Hill, Chapel Hill, NC 27599, USA

<sup>4</sup>Albemarle Regional Health Services, Elizabeth City, NC 27909, USA

<sup>5</sup>Department of Civil and Environmental Engineering, Duke University, Durham, NC 27708, USA

<sup>6</sup>Center for Geospatial Analytics, North Carolina State University, Raleigh, NC 27695, USA

<sup>7</sup>Department of Forestry and Environmental Resources, North Carolina State University, Raleigh, NC 27695, USA <sup>8</sup>Department of Earth, Marine, and Environmental Sciences, UNC-Chapel Hill, Chapel Hill, NC 27599, USA

<sup>9</sup>Institute of Marine Sciences, UNC-Chapel Hill, Morehead City, NC 28557, USA

\*Corresponding Author: Haley E. Plaas ([heplaas@ncsu.edu](mailto:heplaas@ncsu.edu); 2800 Faucette Dr., 1142 Jordan Hall, NC State University, Raleigh, NC 27695)

October 2024

No. of SI Pages: 12

No. of SI Figures: 5

No. of SI Tables: 4

No. of SI Equations: 0

No. of SI Schemes: 0

38 **Table S1.** Descriptive statistics for composited (weekly) satellite data surrounding each PurpleAir sensor.

| Sensor ID | Pixel Grid 'radius' | Water Surface Area | Data Completeness | Sensor ID | Pixel Grid 'radius' | Water Surface Area | Data Completeness |
|-----------|---------------------|--------------------|-------------------|-----------|---------------------|--------------------|-------------------|
| 1806      | 0.62 km             | 25%                | 99 ± 3%           | 1318      | 0.62 km             | 0%                 | 100 ± 0%          |
| 1806      | 1.2 km              | 40%                | 96 ± 3%           | 1318      | 1.2 km              | 4%                 | 98 ± 2%           |
| 1806      | 2.4 km              | 66%                | 98 ± 4%           | 1318      | 2.4 km              | 8%                 | 98 ± 2%           |
| 1680      | 0.62 km             | 50%                | 96 ± 12%          | 1344      | 0.62 km             | 0%                 | 100 ± 0%          |
| 1680      | 1.2 km              | 47%                | 97 ± 10%          | 1344      | 1.2 km              | 0%                 | 100 ± 0%          |
| 1680      | 2.4 km              | 43%                | 98 ± 8%           | 1344      | 2.4 km              | 3%                 | 97 ± 1%           |
| 1378      | 0.62 km             | 56%                | 96 ± 12%          | 1358      | 0.62 km             | 0%                 | 100 ± 0%          |
| 1378      | 1.2 km              | 51%                | 97 ± 9%           | 1358      | 1.2 km              | 0%                 | 100 ± 0%          |
| 1378      | 2.4 km              | 38%                | 97 ± 6%           | 1358      | 2.4 km              | 0%                 | 100 ± 0%          |
| 5822      | 0.62 km             | 50%                | 95 ± 12%          | 1562      | 0.62 km             | 0%                 | 100 ± 0%          |
| 5822      | 1.2 km              | 47%                | 97 ± 10%          | 1562      | 1.2 km              | 0%                 | 100 ± 0%          |
| 5822      | 2.4 km              | 37%                | 98 ± 7%           | 1562      | 2.4 km              | 0%                 | 100 ± 0%          |
| 1334      | 0.62 km             | 39%                | 97 ± 9%           |           |                     |                    |                   |
| 1334      | 1.2 km              | 44%                | 97 ± 9%           |           |                     |                    |                   |
| 1334      | 2.4 km              | 37%                | 98 ± 7%           |           |                     |                    |                   |
| 1362      | 0.62 km             | 33%                | 98 ± 8%           |           |                     |                    |                   |
| 1362      | 1.2 km              | 26%                | 97 ± 5%           |           |                     |                    |                   |
| 1362      | 2.4 km              | 19%                | 98 ± 3%           |           |                     |                    |                   |
| 1348      | 0.62 km             | 22%                | 96 ± 6%           |           |                     |                    |                   |
| 1348      | 1.2 km              | 22%                | 97 ± 4%           |           |                     |                    |                   |
| 1348      | 2.4 km              | 17%                | 99 ± 3%           |           |                     |                    |                   |
| 5838      | 0.62 km             | 8%                 | 98 ± 3%           |           |                     |                    |                   |
| 5838      | 1.2 km              | 16%                | 98 ± 3%           |           |                     |                    |                   |
| 5838      | 2.4 km              | 14%                | 99 ± 2%           |           |                     |                    |                   |
| 9875      | 0.62 km             | 22%                | 89 ± 8%           |           |                     |                    |                   |
| 9875      | 1.2 km              | 18%                | 93 ± 6%           |           |                     |                    |                   |
| 9875      | 2.4 km              | 13%                | 96 ± 3%           |           |                     |                    |                   |

39

40

41 **Tables S2.** Outline of the simplified generalized additive models performed to examine PM<sub>2.5</sub> mass as a function of  
 42 the univariate and mixed effects of **AQS-measured CAPs pollutants**. Each row represents a model run with the  
 43 descriptor variables specified in each column. An x indicates the variable was treated as an independent smooth term  
 44 in the model equation. Multiple x's per row indicate the variables were considered for their additive effects. Paired  
 45 letters (a-b-c) indicate covariates treated with an interactive term. The Akaike Information Criterion (AIC) and  
 46 Bayesian Information Criterion (BIC) are provided for inter-model comparison.  
 47

**Table S2.**

| Variable            | CO | O <sub>3</sub> | PO <sub>4</sub> | SO <sub>2</sub> | NO <sub>x</sub> | AIC  | BIC  |
|---------------------|----|----------------|-----------------|-----------------|-----------------|------|------|
| PM <sub>2.5</sub> ~ |    |                |                 | x               |                 | 2808 | 2844 |
| PM <sub>2.5</sub> ~ |    |                | x               |                 |                 | 2879 | 2920 |
| PM <sub>2.5</sub> ~ | x  |                |                 |                 |                 | 3394 | 3443 |
| PM <sub>2.5</sub> ~ |    |                |                 |                 | c               | 2885 | 2930 |
| PM <sub>2.5</sub> ~ |    | x              |                 |                 |                 | 2416 | 2453 |
| PM <sub>2.5</sub> ~ |    | x              |                 | x               |                 | 2266 | 2333 |
| PM <sub>2.5</sub> ~ |    | x              | x               |                 |                 | 2284 | 2351 |
| PM <sub>2.5</sub> ~ |    | x              |                 |                 | x               | 2322 | 2392 |
| PM <sub>2.5</sub> ~ | x  | x              |                 |                 |                 | 2052 | 2132 |
| PM <sub>2.5</sub> ~ |    | a              |                 |                 | a               | 2282 | 2362 |
| PM <sub>2.5</sub> ~ | b  | x              |                 | b               |                 | 1772 | 1910 |
| PM <sub>2.5</sub> ~ | x  | x              |                 | x               |                 | 1854 | 1971 |
| PM <sub>2.5</sub> ~ | x  | a              |                 | x               | a               | 1851 | 2000 |
| PM <sub>2.5</sub> ~ | b  | x              |                 | b               | x               | 1741 | 1891 |
| PM <sub>2.5</sub> ~ | b  | x              | x               | b               | x               | 1580 | 1784 |

48  
 49

**Tables S3.** Outline of the simplified generalized additive models performed to examine PM<sub>2.5</sub> mass as a function of the univariate and mixed effects of **meteorological conditions**. Each row represents a model run with the descriptor variables specified in each column. An x indicates the variable was treated as an independent smooth term in the model equation. Multiple x's per row indicate the variables were considered for their additive effects. Paired letters (a-b-c) indicate covariates treated with an interactive term. The Akaike Information Criterion (AIC) and Bayesian Information Criterion (BIC) are provided for inter-model comparison.

| Variable            | Wind Speed | Wind Direction | Solar Radiation | Temperature | Relative Humidity | AIC  | BIC  |
|---------------------|------------|----------------|-----------------|-------------|-------------------|------|------|
| PM <sub>2.5</sub> ~ | x          |                |                 |             |                   | 3509 | 3527 |
| PM <sub>2.5</sub> ~ |            | x              |                 |             |                   | 3516 | 3541 |
| PM <sub>2.5</sub> ~ |            |                | x               |             |                   | 3422 | 3455 |
| PM <sub>2.5</sub> ~ |            |                |                 | x           |                   | 3408 | 3435 |
| PM <sub>2.5</sub> ~ |            |                |                 |             | x                 | 3516 | 3541 |
| PM <sub>2.5</sub> ~ |            |                |                 | a           | a                 | 3378 | 3446 |
| PM <sub>2.5</sub> ~ |            |                |                 | x           | x                 | 3400 | 3445 |
| PM <sub>2.5</sub> ~ |            |                | b               | b           |                   | 3371 | 3441 |
| PM <sub>2.5</sub> ~ |            |                | x               | x           |                   | 3389 | 3432 |
| PM <sub>2.5</sub> ~ | c          | c              |                 |             |                   | 3487 | 3556 |
| PM <sub>2.5</sub> ~ | x          | x              |                 |             |                   | 3506 | 3541 |
| PM <sub>2.5</sub> ~ |            |                | x               | a           | a                 | 3367 | 3511 |
| PM <sub>2.5</sub> ~ |            |                | b               | b           | X                 | 3366 | 3453 |
| PM <sub>2.5</sub> ~ |            | x              | x               | a           | a                 | 3361 | 3457 |
| PM <sub>2.5</sub> ~ | x          |                | x               | a           | a                 | 3347 | 3444 |
| PM <sub>2.5</sub> ~ | x          | x              | x               | a           | a                 | 3347 | 3452 |

**Tables S4.** Outline of the simplified generalized additive models performed to examine PM<sub>2.5</sub> mass as a function of the univariate and mixed effects of **satellite-derived CyanoHAB indicators**. Each row represents a model run with the descriptor variables specified in each column. An x indicates the variable was treated as an independent smooth term in the model equation. Multiple x's per row indicate the variables were considered for their additive effects. Paired letters (a-b-c) indicate covariates treated with an interactive term. The Akaike Information Criterion (AIC) and Bayesian Information Criterion (BIC) are provided for inter-model comparison.

| Variable            | CyanoHAB intensity 0.6 km | CyanoHAB intensity 1.2 km | CyanoHAB intensity 2.4 km | CyanoHAB Spatial Extent 0.6 km | CyanoHAB Spatial Extent 1.2 km | CyanoHAB Spatial Extent 2.4 km | AIC  | BIC  |
|---------------------|---------------------------|---------------------------|---------------------------|--------------------------------|--------------------------------|--------------------------------|------|------|
| PM <sub>2.5</sub> ~ | x                         |                           |                           |                                |                                |                                | 1347 | 1361 |
| PM <sub>2.5</sub> ~ |                           | x                         |                           |                                |                                |                                | 1346 | 1361 |
| PM <sub>2.5</sub> ~ |                           |                           | x                         |                                |                                |                                | 1345 | 1360 |
| PM <sub>2.5</sub> ~ |                           |                           |                           | x                              |                                |                                | 1349 | 1363 |
| PM <sub>2.5</sub> ~ |                           |                           |                           |                                | x                              |                                | 1348 | 1362 |
| PM <sub>2.5</sub> ~ |                           |                           |                           |                                |                                | x                              | 1346 | 1361 |
| PM <sub>2.5</sub> ~ | a                         |                           |                           | a                              |                                |                                | 1347 | 1369 |
| PM <sub>2.5</sub> ~ |                           | b                         |                           |                                | b                              |                                | 1342 | 1364 |
| PM <sub>2.5</sub> ~ |                           |                           | c                         |                                |                                | c                              | 1343 | 1365 |
| PM <sub>2.5</sub> ~ | d                         | d                         | d                         |                                |                                |                                | 1341 | 1377 |

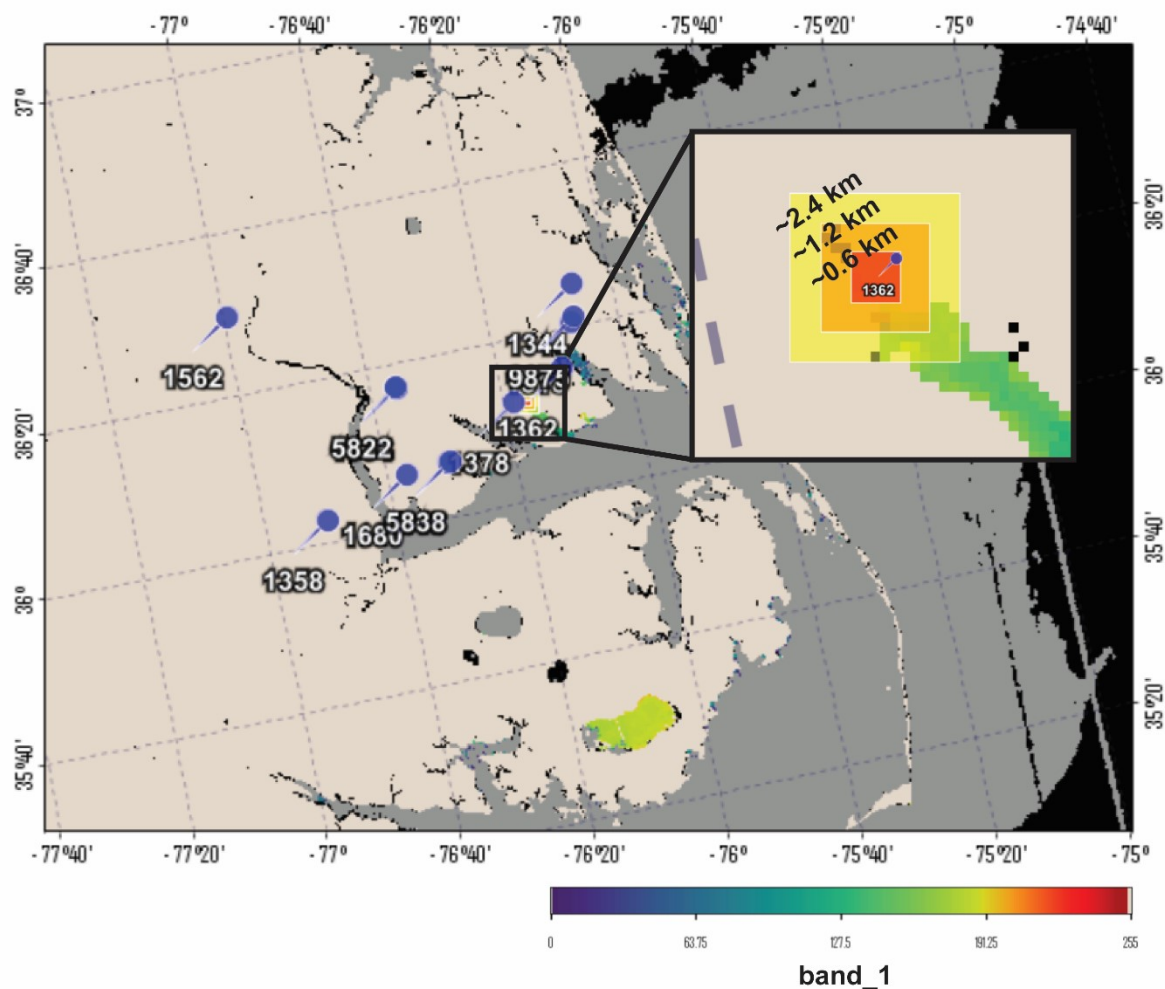

**Figure S1.** A SeaDAS map with pixel grid overlays at each distance (0.6, 1.2, and 2.4 km from the center pixel) over which cyanobacterial harmful algal bloom cell counts and surface area was composited.

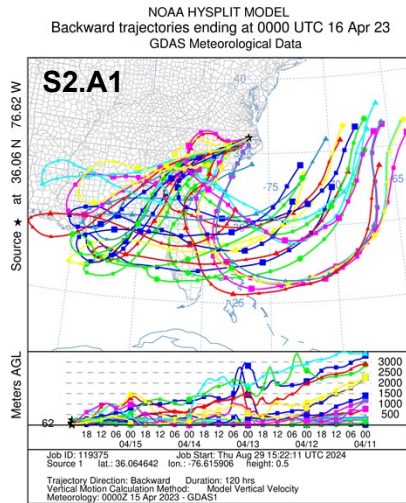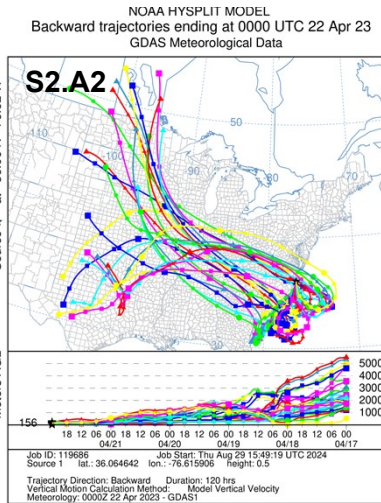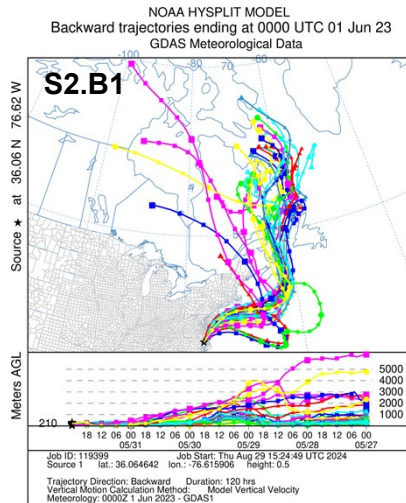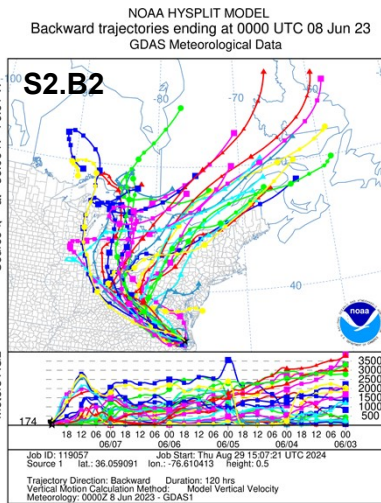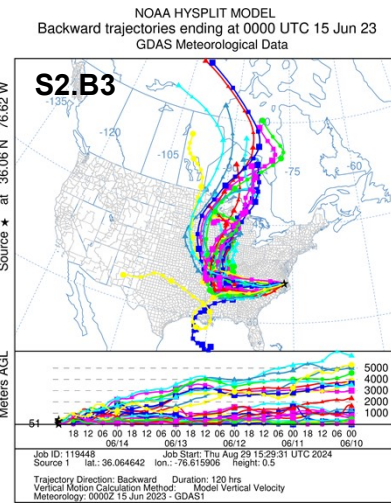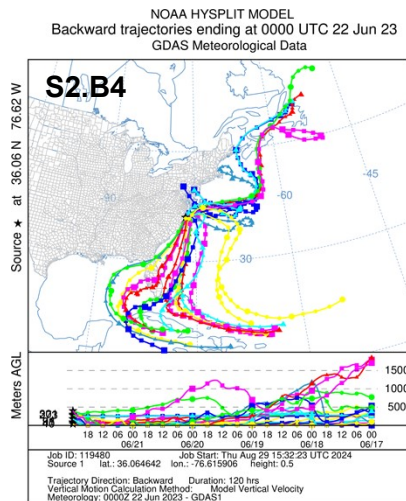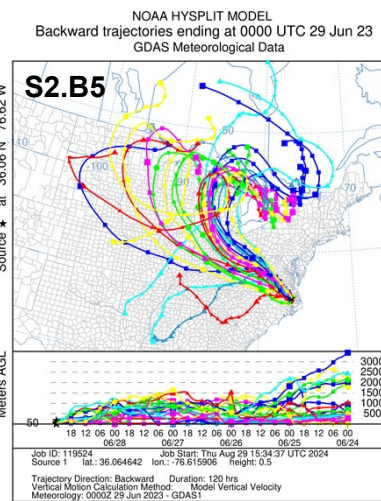



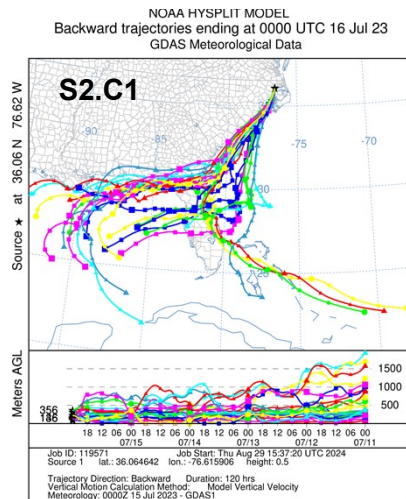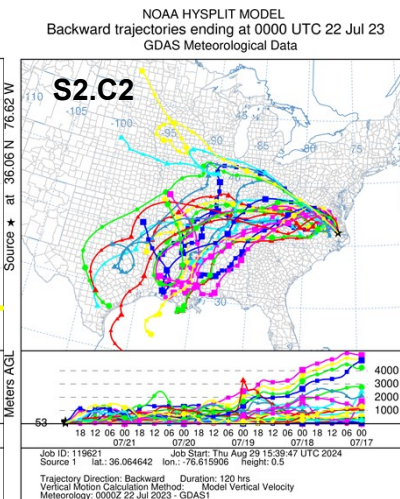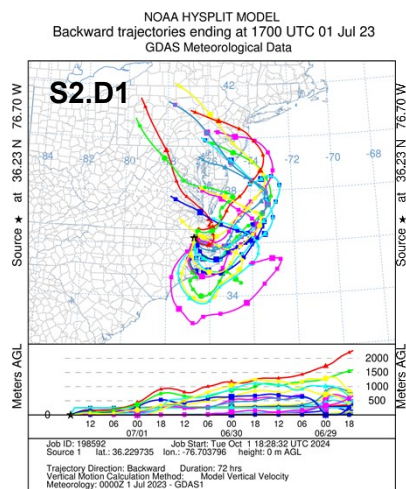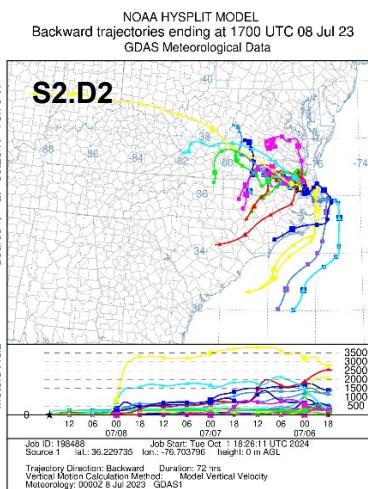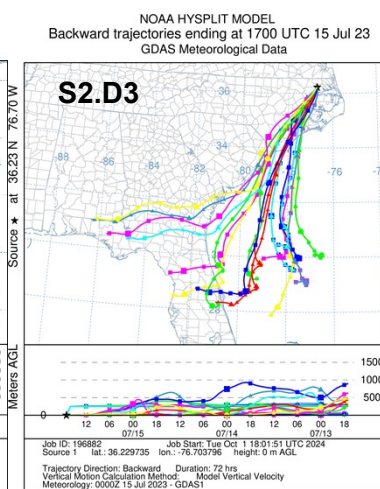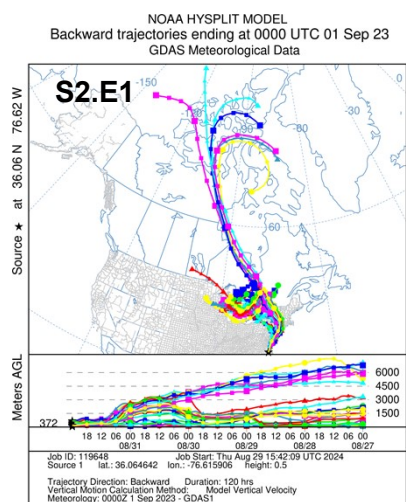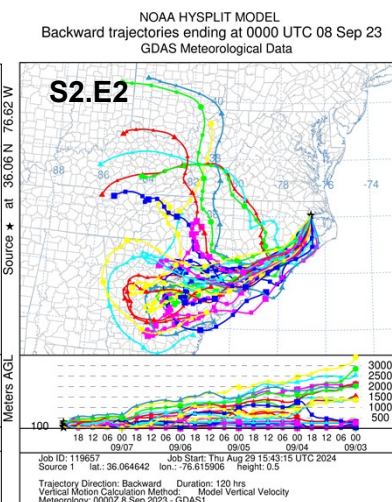



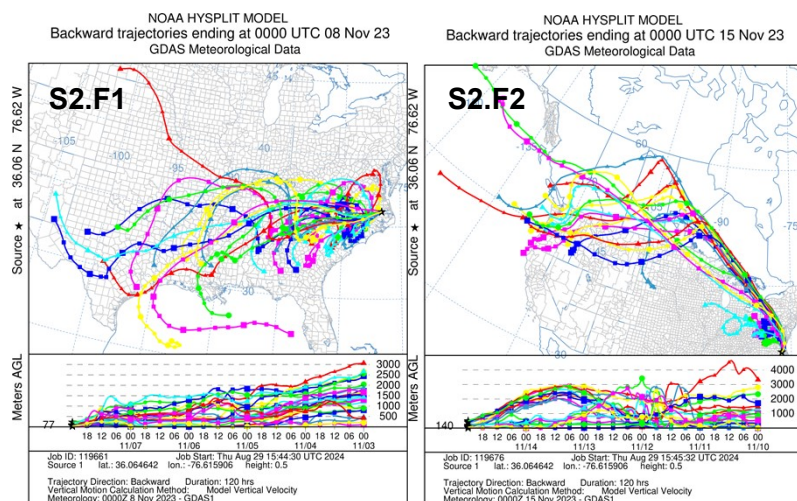

80

81 **Figure S2.** NOAA Hybrid Single-Particle Lagrangian Integrated Trajectory (HYSPLIT) model results for the  
 82 beginning and end of each week when episodic air pollution events were identified, indicated by  $PM_{2.5}$  values that  
 83 exceeded seasonal averages by  $> 1$  standard deviation. A1-2 indicates the pollution event in April, B1-5 three events  
 84 in June, C1-2 July, D1-3 July in association with elevated CyanoHABs in Arrowhead Beach, E1-2 September, and  
 85 F1-2 November (all in 2023).

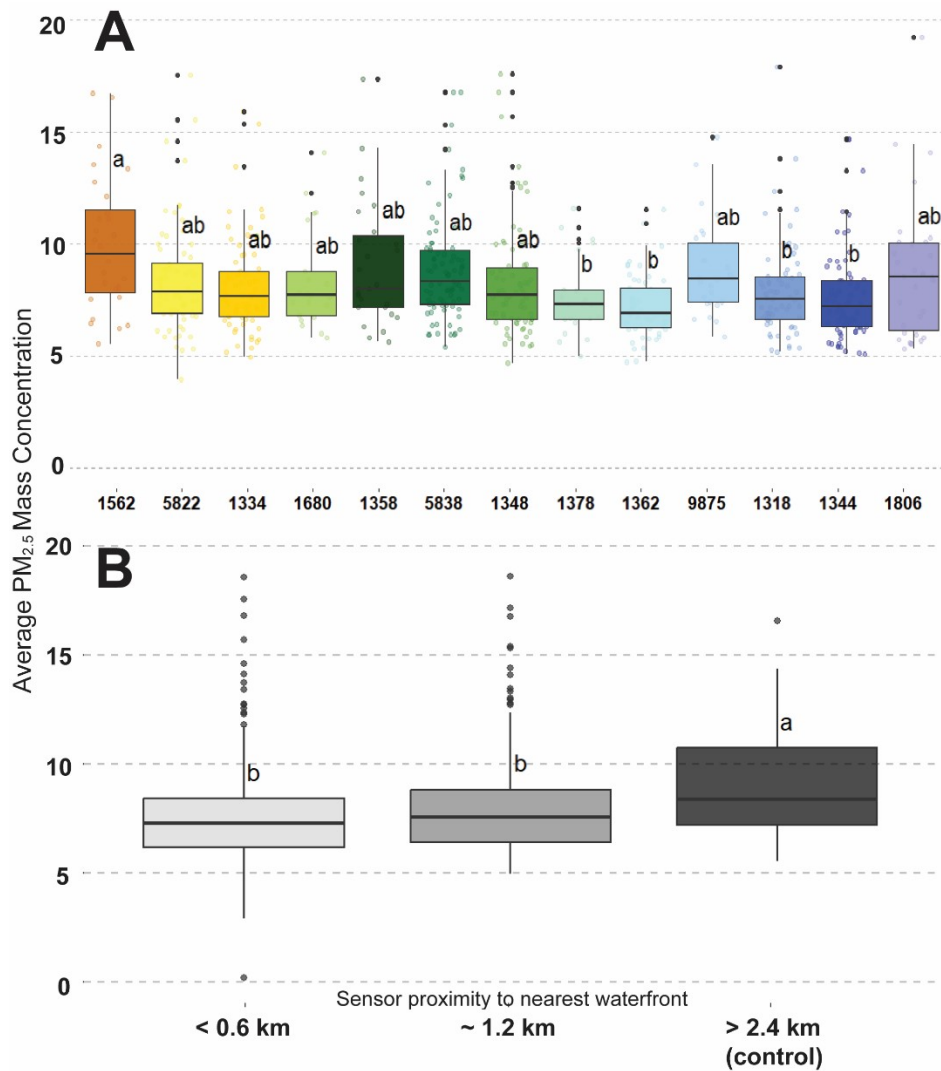

**Figure S3.** Average PM<sub>2.5</sub> mass concentrations (US-wide correction), grouped by individual sensors (A) and proximity to the nearest HAB hotspot (B). Statistical differences between groups via Tukey's comparison of means are indicated with lowercase letters (a-b).

90

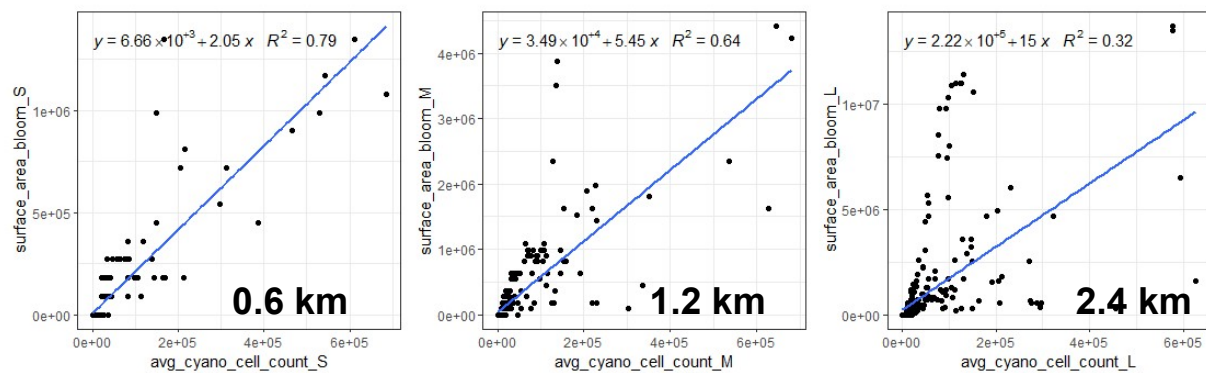

91

92 **Figure S4.** Linear regression analyses of correlation between harmful algal bloom intensity (bloom cell count) and  
 93 spatial extent (bloom surface area), collected at three satellite imagery pixel grid sizes: (S) 0.6 km, (M) 1.2 km, and  
 94 (L) 2.4 km extending from each sensor.

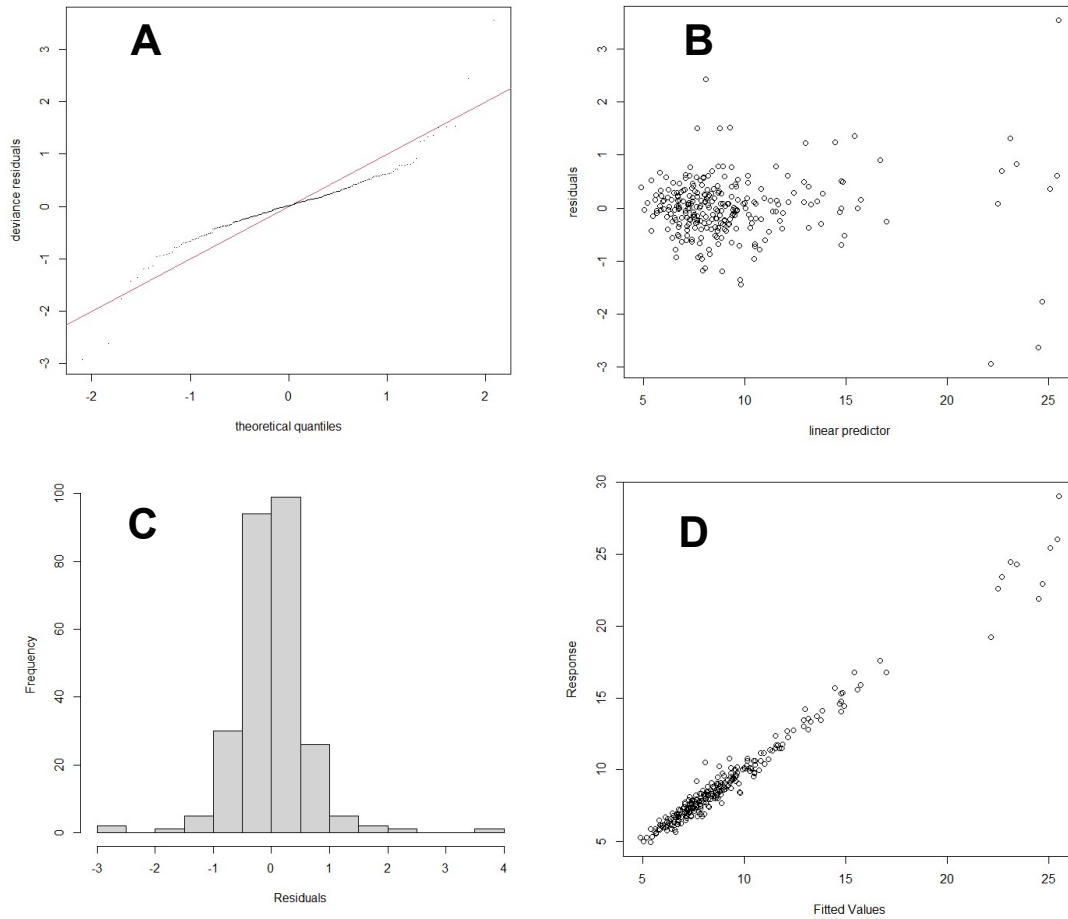

97 **Figure S5.** Generalized Additive Model diagnostic plots (A- quantile-quantile, B- residuals vs. predictor values, C-  
 98 histogram of residuals, D- residuals vs. fitted values) for the model ( $n = 266$ ) selected for best fit (**Table 1**, main text),  
 99 including solar radiation, temperature\*humidity,  $O_3$ ,  $PO_4$ ,  $NO_x$ ,  $CO \cdot SO_2$ , and HAB\*wind speed as predictors. Final  
 100 deviance explained was 97.5% with  $R^2 = 0.963$ .
